# Supplementary material for: Overexpression of LncRNA MNX1-AS1/PPFIA4 Activates AKT/HIF-1α Signal Pathway to Promote Stemness of Colorectal Adenocarcinoma Cells
Source: Hindawi journal article supplement (doi:10.1155/2022/8303409), 2022-10-03

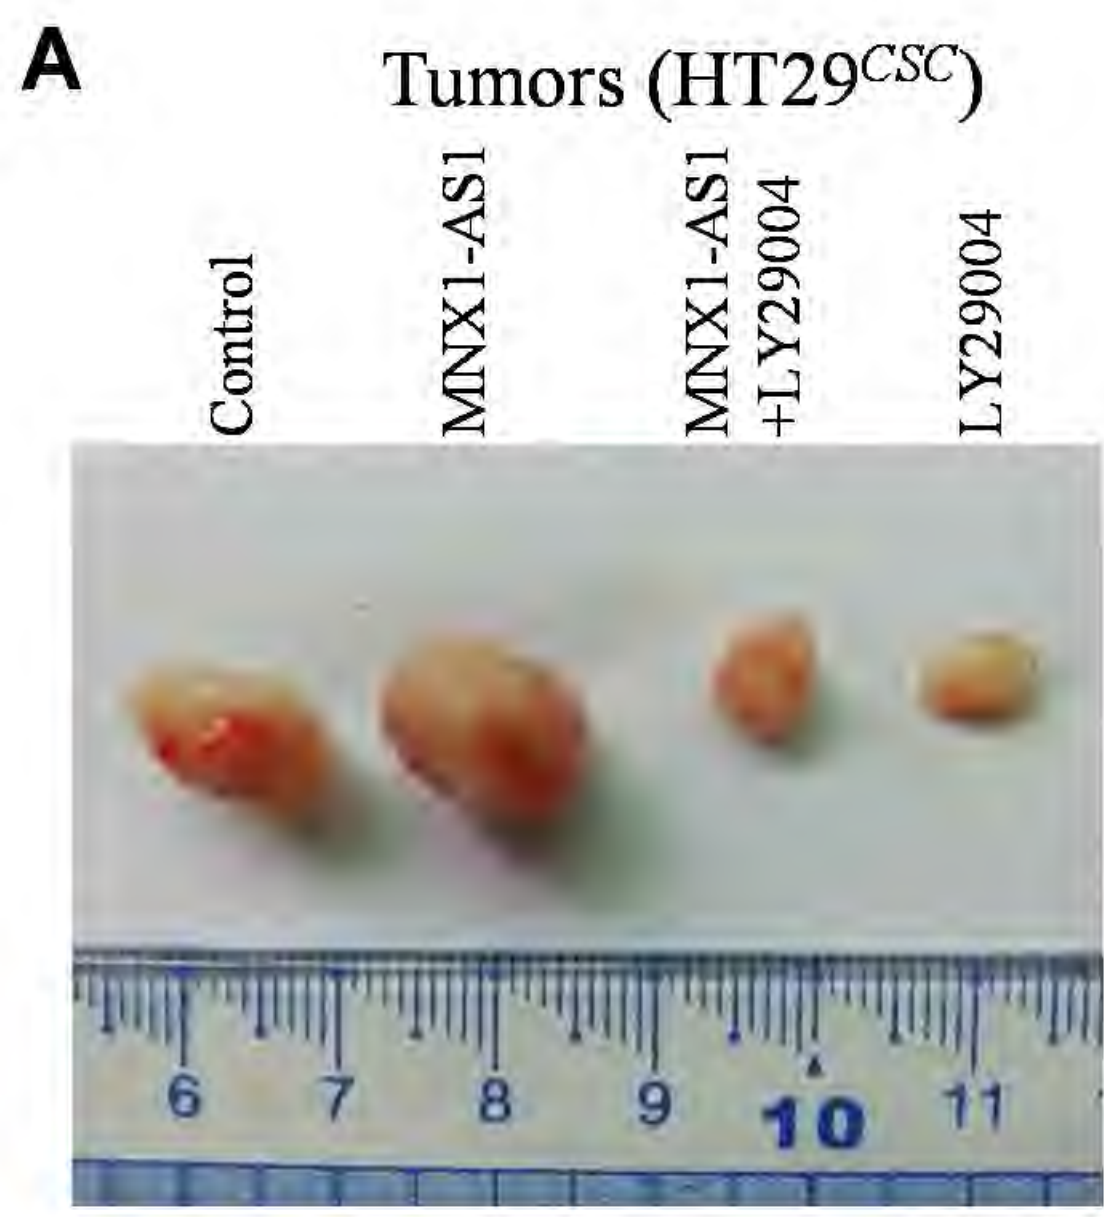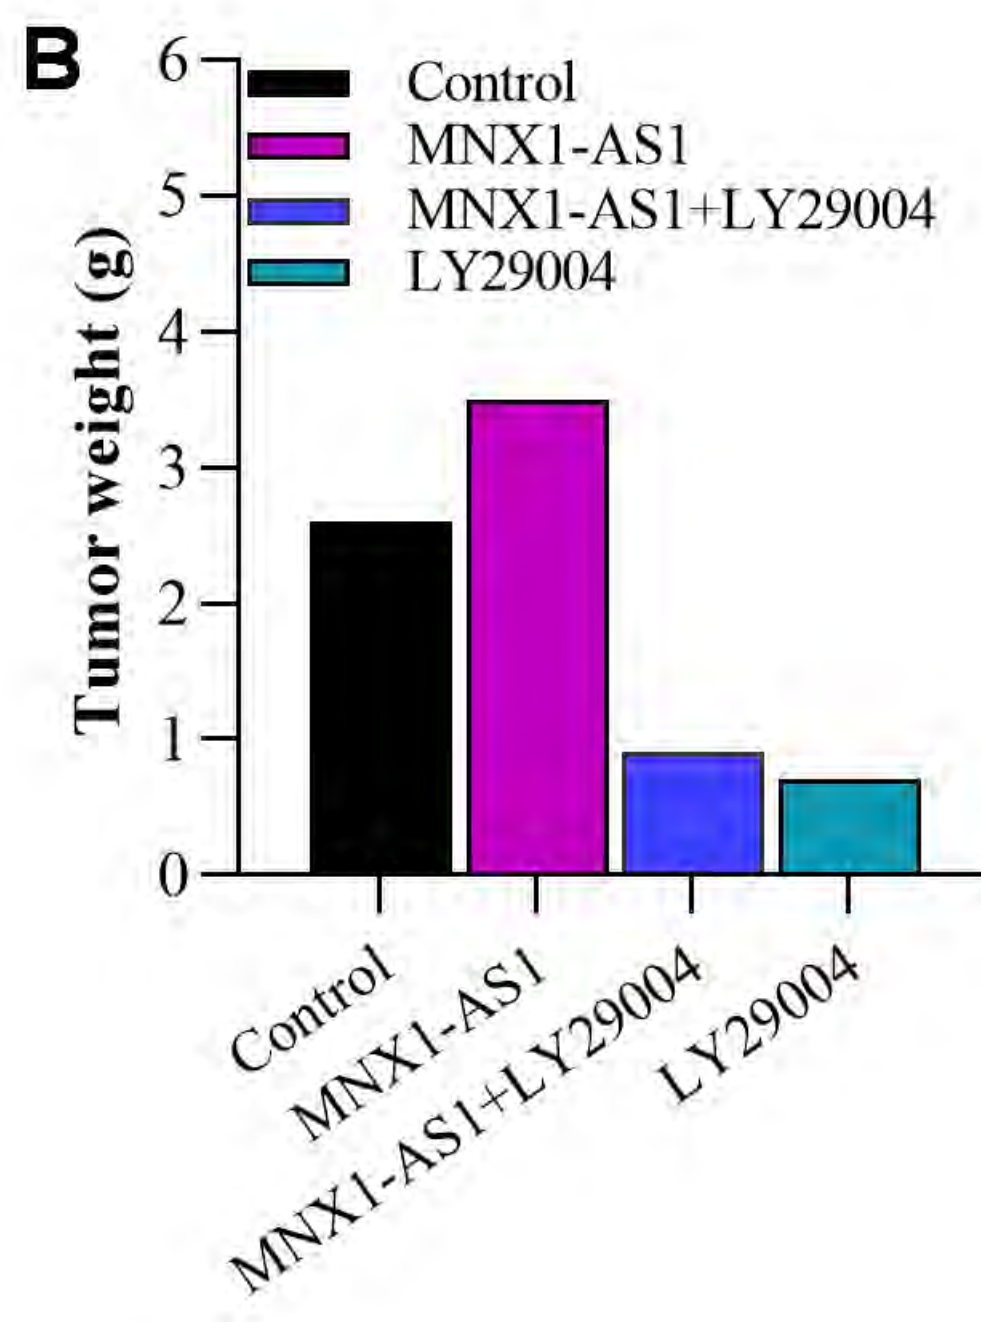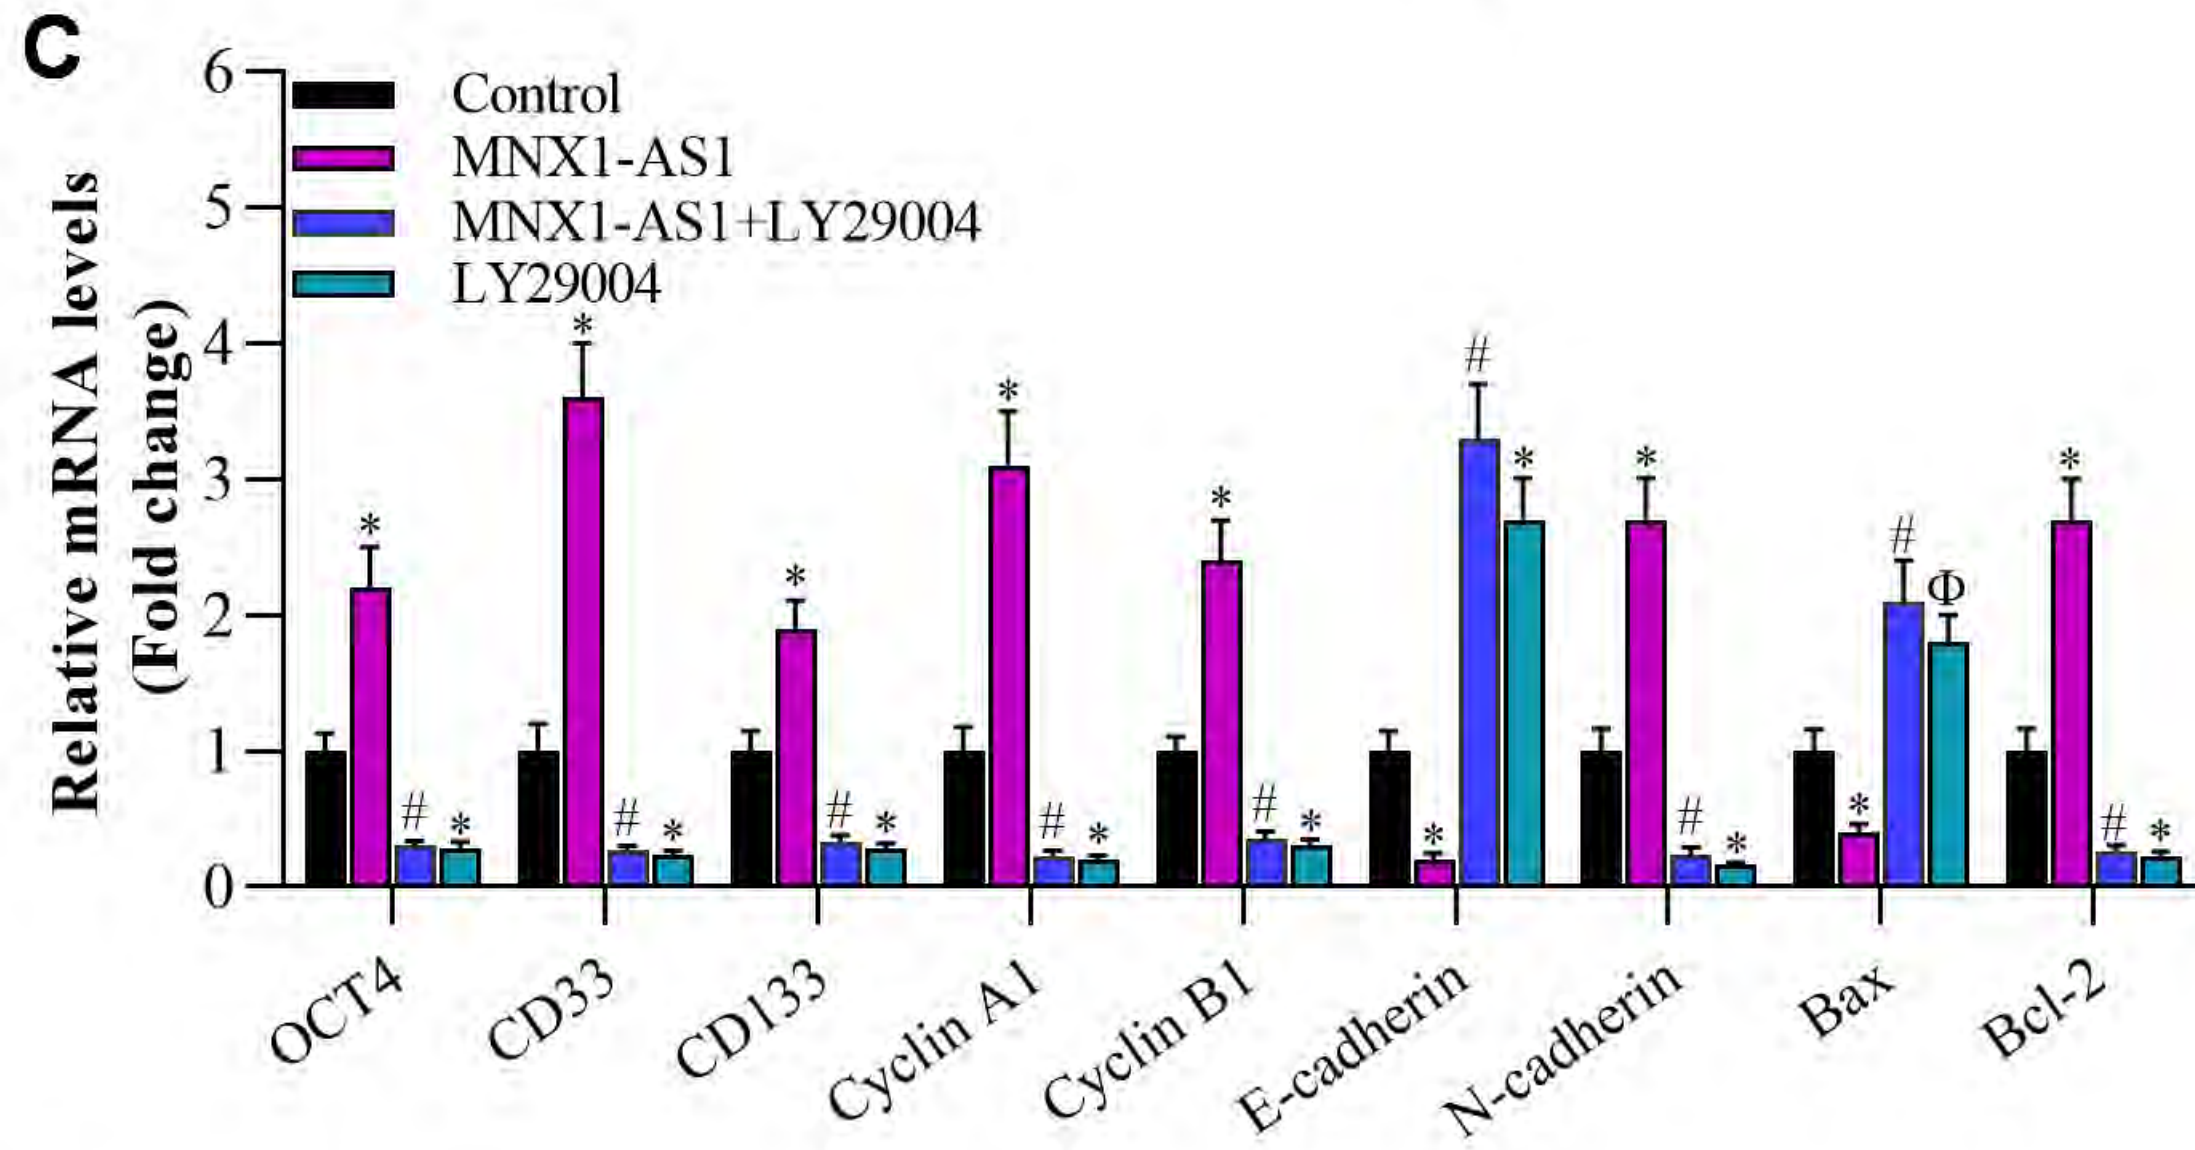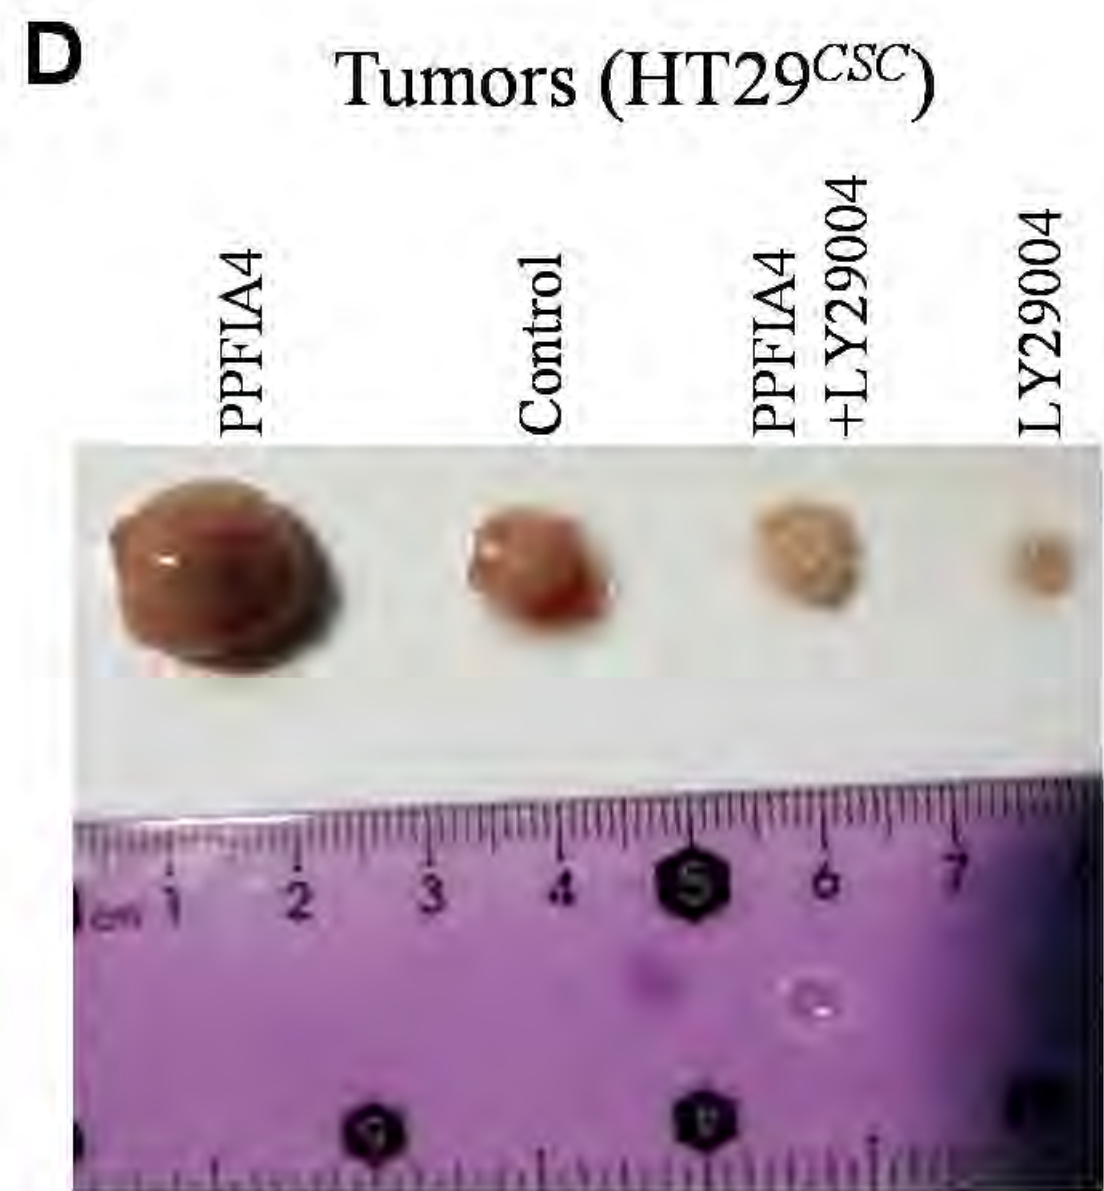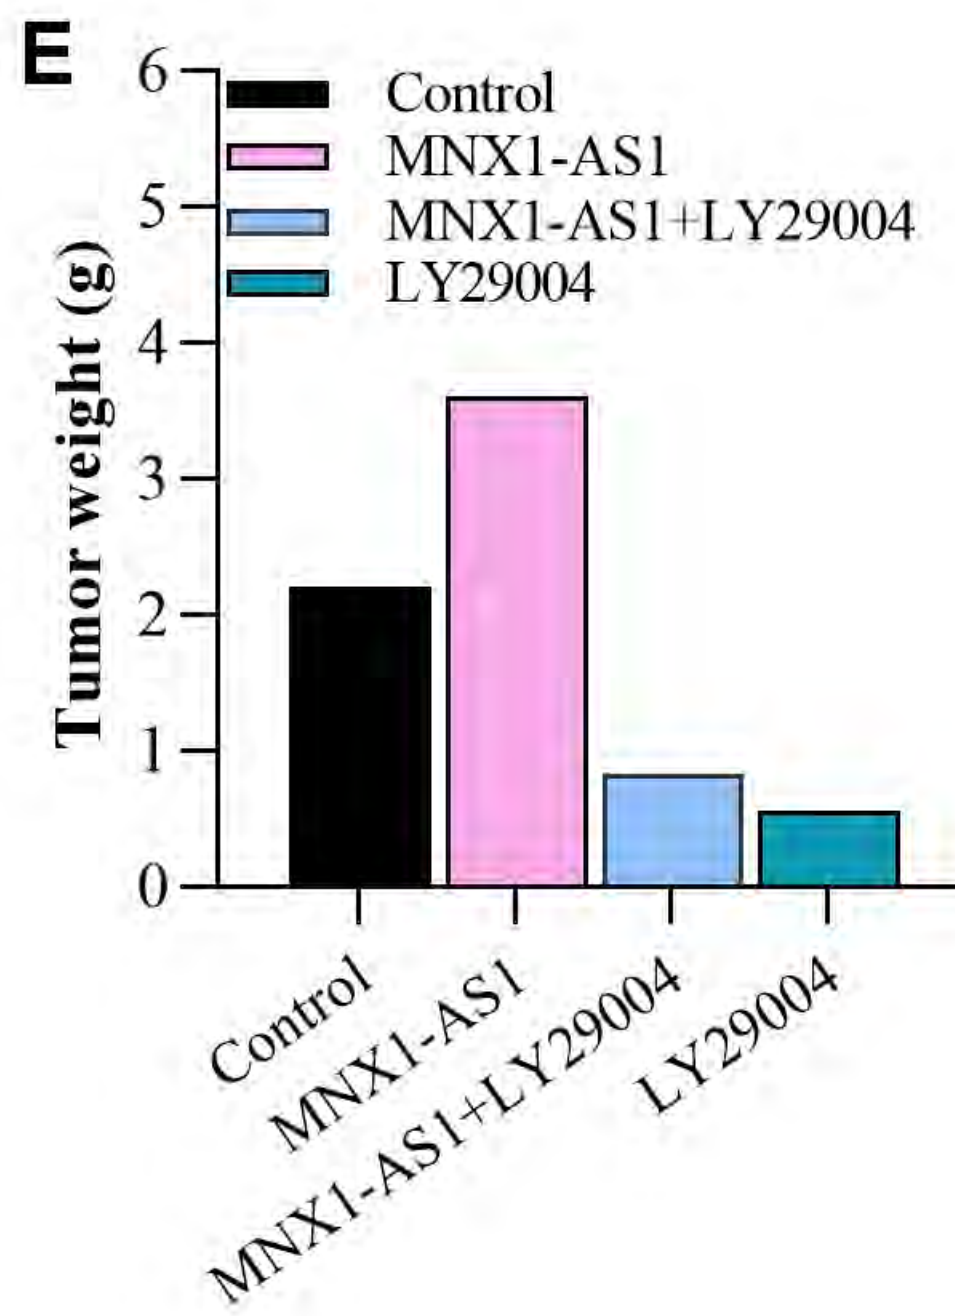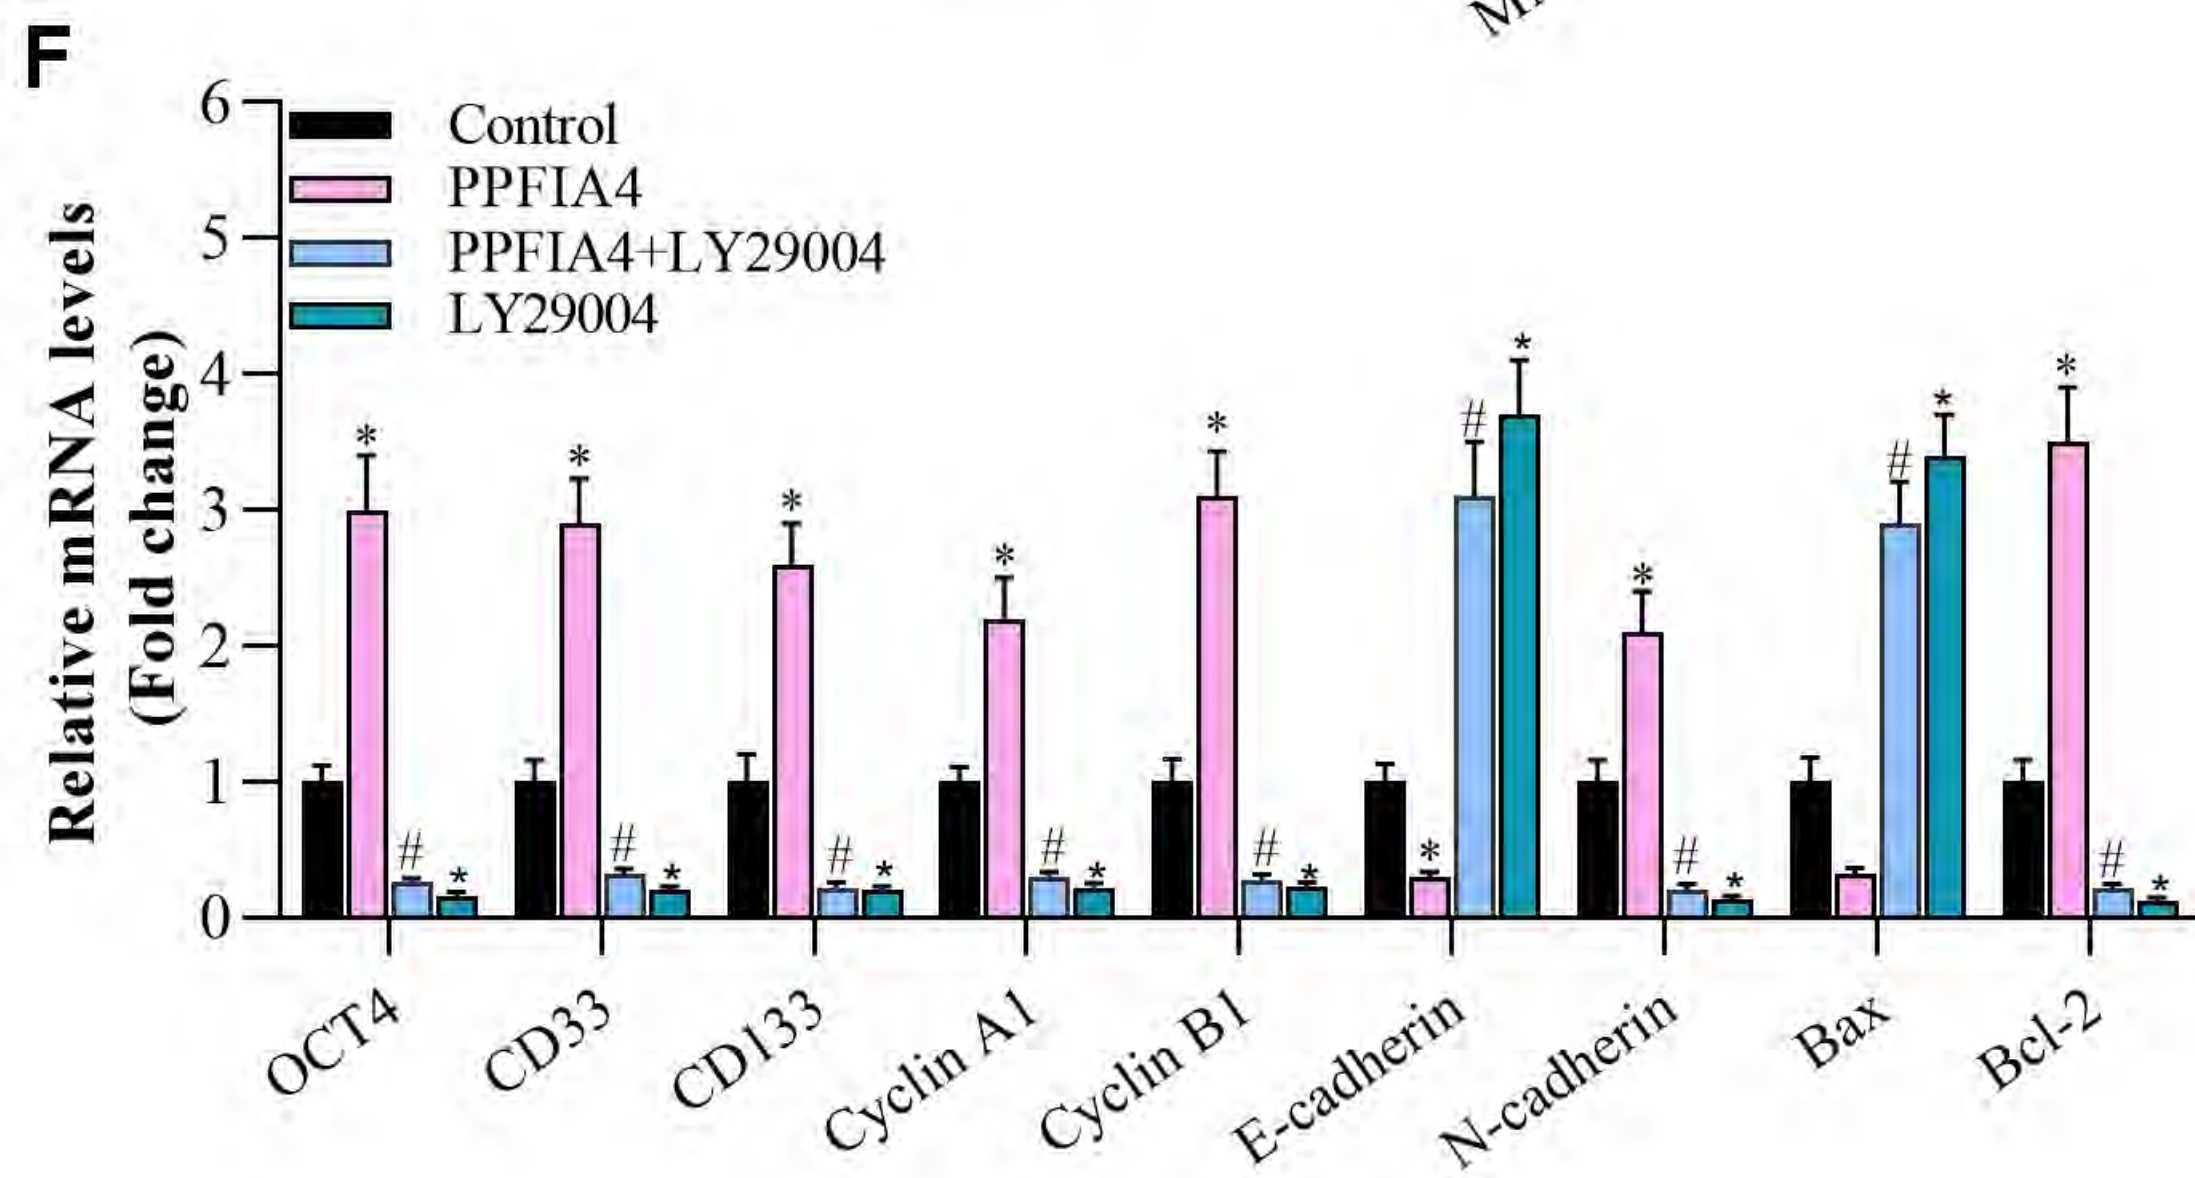

Supplement: f1 [file 8303409.f1.pdf]
